# Supplementary material
Source: PubMed Central journal article supplement (PMC7964886)
Supplement: 15-00001.pdf [file 15-00001.pdf]

**On-line Table 1: Characteristics of patients in the prospective series<sup>a</sup>**

| Cases | Race        | Sex, Age at First Stroke (yr) | Other Risk Factors                         | NIHSS on Presentation | Side of Web | Intracranial Occlusion Site on Final Presentation | No. of Recurrent Strokes | Time to Recurrent Strokes (mo) | Therapy Prior to Recurrent Stroke | Interval Thrombus Growth on Imaging | CEA | Findings at CEA                                                         | mRS at Last Follow-Up |
|-------|-------------|-------------------------------|--------------------------------------------|-----------------------|-------------|---------------------------------------------------|--------------------------|--------------------------------|-----------------------------------|-------------------------------------|-----|-------------------------------------------------------------------------|-----------------------|
| 1     | Caucasian   | M, 54                         | None                                       | 11                    | Right       | M1 MCA                                            | 1                        | 97                             | ASA stopped 7 days prior          | Yes, while on ASA and clopidogrel   | Yes | Healed fibrous dissection                                               | 1                     |
| 2     | East Asian  | F, 59                         | PFO                                        | 11, 12                | Right       | M1 MCA                                            | 3                        | 32, 30, 1                      | ASA and clopidogrel               | No                                  | Yes | Fragile, not fibrous, appearance of typical atherosclerotic soft plaque | 1                     |
| 3     | South Asian | F, 44                         | Positive MES on TCD on side of carotid web | 0, 0                  | Right       | None                                              | 1                        | 5                              | ASA stopped 7 days prior          | Probable                            | No  | Not performed                                                           | 0                     |
| 4     | Caucasian   | F, 55                         | None                                       | 14                    | Left        | M1 MCA                                            | 1                        | 13                             | Clopidogrel                       | No                                  | Yes | Not documented                                                          | 0                     |
| 5     | Caucasian   | M, 41                         | Migraine                                   | 2, 19                 | Left        | M1 MCA                                            | 1                        | 1                              | ASA                               | Yes, while on ASA                   | Yes | Pinkish gelatinous plaque associated with dissection flap               | 2                     |
| 6     | South Asian | F, 49                         | None                                       | 0                     | Right       | M1 MCA                                            | 0                        | NA                             | NA                                | No                                  | No  | NA                                                                      | 0                     |
| 7     | Caucasian   | F, 52                         | Previous smoker                            | 15                    | Right       | M1 MCA                                            | 0                        | NA                             | NA                                | No                                  | No  | NA                                                                      | 4                     |

**Note:**—PFO indicates patent foramen ovale; MES, microembolic signal; TCD, transcranial Doppler ultrasound; CEA, carotid endarterectomy; NA, not applicable.

<sup>a</sup> All patients in this series had stroke/TIA on the same side as the web. Two previous strokes prior to presentation to our stroke center were in the same vascular territory.

**Online Table 2: Characteristics of patients in the retrospective series**

| Age at the time of CTA (yr) | Sex    | Side of ICA Lesion | Intracranial Occlusion | DWI Lesion                                  | Evidence of Previous Infarct | Discharge Diagnosis       | Antithrombotic Use Prior to Event | Atherosclerotic Plaque in Other Arteries on CTA | Vascular Risk Factors <sup>a</sup> |
|-----------------------------|--------|--------------------|------------------------|---------------------------------------------|------------------------------|---------------------------|-----------------------------------|-------------------------------------------------|------------------------------------|
| Carotid web                 |        |                    |                        |                                             |                              |                           |                                   |                                                 |                                    |
| 47                          | Male   | Left               | Right M1               | Right MCA                                   | Right MCA                    | Stroke                    | ASA                               | Yes                                             | Yes                                |
| 68                          | Male   | Left               | None                   | None                                        | None                         | Benign neurological event | None                              | Yes                                             | None                               |
| 78                          | Female | Right              | None                   | Left MCA                                    | None                         | Stroke                    | None                              | Yes                                             | None                               |
| 74                          | Male   | Left               | Left M1                | Left MCA                                    | None                         | Stroke                    | None                              | Yes                                             | Yes                                |
| 67                          | Female | Right              | Right SCA              | None                                        | None                         | Migraine                  | None                              | Yes                                             | Yes                                |
| 55                          | Female | Right              | None                   | None                                        | None                         | Left hemispheric TIA      | None                              | No                                              | Yes                                |
| 49                          | Female | Left               | Left A2, M2            | Left ACA                                    | None                         | Stroke                    | None                              | Yes                                             | None                               |
| Small protruding lesions    |        |                    |                        |                                             |                              |                           |                                   |                                                 |                                    |
| 57                          | Male   | Right              | None                   | None                                        | None                         | Peripheral vertigo        | ASA                               | Yes                                             | None                               |
| 64                          | Male   | Right              | None                   | None                                        | None                         | Benign neurological event | None                              | Yes                                             | None                               |
| 59                          | Female | Right              | None                   | None                                        | None                         | RCVS                      | None                              | No                                              | None                               |
| 53                          | Female | Left               | Left M2                | Left MCA                                    | None                         | Stroke                    | None                              | No                                              | None                               |
| 59                          | Male   | Left               | None                   | Medial right thalamus and cerebellar vermis | None                         | Stroke                    | ASA                               | No                                              | Yes                                |
| 51                          | Male   | Right              | None                   | Right PICA                                  | None                         | Stroke                    | None                              | Yes                                             | Yes                                |
| 64                          | Male   | Right              | None                   | Left MCA                                    | None                         | Stroke                    | ASA                               | Yes                                             | Yes                                |
| 72                          | Male   | Left               | None                   | None                                        | None                         | Benign neurological event | Warfarin                          | Yes                                             | Yes                                |
| 72                          | Female | Right              | None                   | None                                        | None                         | Pneumonia                 | None                              | Yes                                             | None                               |
| 66                          | Female | Left               | None                   | Left MCA                                    | None                         | Stroke                    | None                              | Yes                                             | None                               |
| 39                          | Female | Left               | None                   | None                                        | None                         | Optic neuritis            | None                              | No                                              | None                               |
| 65                          | Male   | Right              | None                   | None                                        | Right                        | Leptomeningeal metastases | None                              | Yes                                             | None                               |
| 90                          | Female | Left               | Left M2                | Left MCA                                    | None                         | Stroke                    | ASA                               | Yes                                             | None                               |
| 72                          | Male   | Left               | None                   | None                                        | Right MCA                    | Seizure                   | Warfarin                          | No                                              | Yes                                |

**Note:**—ACA indicates anterior cerebral artery; RCVS, reversible cerebral vasoconstriction syndrome; SCA, superior cerebellar artery.

<sup>a</sup> Hypertension, hyperlipidemia, atrial fibrillation, or diabetes.
